CORRECTION

# Correction: Response to anti-tuberculosis treatment by people over age 60 in Kampala, Uganda

The *PLOS ONE* Staff

## Notice of republication

An incorrect version of S1 File was published in error. The publisher apologizes for this error. This article was republished on December 21, 2018 to correct for this error. Please download this article again to view the correct version.

## Reference

1. Kirirabwa NS, Kimuli D, DeJene S, Nanziri C, Birabwa E, Okello DA, et al. (2018) Response to anti-tuberculosis treatment by people over age 60 in Kampala, Uganda. *PLoS ONE* 13(12): e0208390. <https://doi.org/10.1371/journal.pone.0208390> PMID: [30566486](https://pubmed.ncbi.nlm.nih.gov/30566486/)

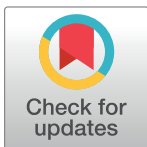

## OPEN ACCESS

**Citation:** The *PLOS ONE* Staff (2019) Correction: Response to anti-tuberculosis treatment by people over age 60 in Kampala, Uganda. *PLoS ONE* 14(1): e0210769. <https://doi.org/10.1371/journal.pone.0210769>

**Published:** January 14, 2019

**Copyright:** © 2019 The PLOS ONE Staff. This is an open access article distributed under the terms of the [Creative Commons Attribution License](https://creativecommons.org/licenses/by/4.0/), which permits unrestricted use, distribution, and reproduction in any medium, provided the original author and source are credited.
